# Supplementary material for: Study of PcaV from Streptomyces coelicolor yields new insights into ligand-responsive MarR family transcription factors
Source: PubMed Central journal article supplement — Nucleic Acids Res. 2013 Feb 8;41(6):3888–900. doi: 10.1093/nar/gkt009 (PMC3616709; doi:10.1093/nar/gkt009), 2013-02-08
Supplement: supp_gkt009_Davis_NAR_2012_Supplementary_Data.pdf [file supp_gkt009_Davis_NAR_2012_Supplementary_Data.pdf]

**Supplementary Data for:**

**Study of PcaV from *Streptomyces coelicolor* Yields New Insights into Ligand-Responsive MarR Family Transcription Factors**

Jennifer R. Davis, Breann L. Brown, Rebecca Page, and Jason K. Sello.

**SI METHODS**

***Transcriptional Response to Aromatic Compounds.*** Shaken liquid cultures of wild-type *S. coelicolor* M600 were grown in NMMP for 14 h after which inducing aromatic compounds were added at a final concentration of 2 mM. After 1 h of induction, total RNA was isolated and quantified as previously discussed. Reverse transcriptase polymerase chain reactions (RT-PCR) were accomplished using the One Step RT-PCR Kit (Qiagen) following the manufacturer's protocol. A 314-bp cDNA corresponding to the *pcaH* (SCO6700) transcript and a 486-bp cDNA corresponding to the *hrdB* (SCO5820) transcript were detected using the *pcaH* RT-PCR and *hrdB* RT-PCR primers, respectively. All primer sequences are listed in **Table S2**. The PCR program used for detection of transcripts was 50°C for 30 min, 95°C for 15 min, 30 cycles of 94°C for 30 s, 58°C for 30 s, and 72°C for 60 s, followed by an elongation time of 10 min at 72°C. PCR products were detected on a 1% agarose gel stained with ethidium bromide. *Pfu* polymerase was used to confirm the absence of contaminating DNA in RNA samples using the same cycling conditions.

***Circular Dichroism Polarimetry.*** Circular dichroism (CD) measurements were performed with a Jasco J-815 CD spectropolarimeter. WT PcaV and PcaV R15K were diluted to 5 μM in 10 mM Tris, 250 mM NaCl, pH 7.5 and placed in a 0.2 cm glass cuvette. PcaV R15A was diluted to 5 μM in 10 mM Tris, 500 mM NaCl, pH 7.5. Wavelength scans were performed in the far-UV region from 260-195 nm at 25°C with a speed of 50 nm/min. Thermal denaturation scans were performed at 220 nm from 25-90°C at a scan speed of 5°C/min. Raw data were converted to mean residue molar ellipticity.

**Table S1: Bacterial Strains and plasmids used for this study**

| Strain or Plasmid          | Description                                                                                                              | Source / Reference                |
|----------------------------|--------------------------------------------------------------------------------------------------------------------------|-----------------------------------|
| <b>Strains</b>             |                                                                                                                          |                                   |
| <i>S. coelicolor</i> A3(2) |                                                                                                                          |                                   |
| M600                       | Prototroph SCP1-, SCP2-                                                                                                  | (30)                              |
| B760                       | M600 $\Delta pcaV::apr$                                                                                                  | (14)                              |
| B792                       | M600 $\Delta pcaV::apr$ – pJS368                                                                                         | This study                        |
| B793                       | M600 $\Delta pcaV::apr$ – pJS369                                                                                         | This study                        |
| B794                       | M600 $\Delta pcaV::apr$ – pJS370                                                                                         | This study                        |
| <i>E. coli</i>             |                                                                                                                          |                                   |
| DH5 $\alpha$               | F- $\phi 80lacZ\Delta M15 \Delta(lacZYA-argF)U169 recA1 endA1 hsdR17(rk-, mk-) phoA supE44 thi-1 gyrA96 relA1 \lambda^-$ | Invitrogen                        |
| BL21(DE3)                  | <i>E. coli</i> B F <sup>-</sup> $ompT hsdS(r_B^- m_B^-) dcm^+ Tet^r gal \lambda(DE3) endA Hte$                           | Stratagene                        |
| ET12567                    | <i>dam, dcm, hsdS, cat, tet</i>                                                                                          | (41)                              |
| <b>Plasmids</b>            |                                                                                                                          |                                   |
| pBluescript KS+            | pUC <i>ori</i> , MCS, Amp <sup>r</sup>                                                                                   | Agilent Technologies (Stratagene) |
| pET28a-c(+)                | pBR322-derived, T7 promoter, Kan <sup>r</sup> ,                                                                          | Novagen                           |
| pGem-T Easy                | pUC-derived, lacZ', Amp <sup>r</sup>                                                                                     | Promega                           |
| pUZ8002                    | RP4 derivative, OriT, Kan <sup>r</sup>                                                                                   | (41)                              |
| pIJ10257                   | oriT, $\Phi$ BT1 attB-int, ermEp*, derived from pMS81, Hyg <sup>r</sup>                                                  | (40)                              |
| pJS361                     | 5'RACE product of primer AAP (kit) and SCO6703 GSP2 in pGEM-T Easy, Amp <sup>r</sup>                                     | This study                        |
| pJS362                     | 5'RACE product of primers AUAP (kit) and SCO6703 GSP3 in pGEM-T Easy, Amp <sup>r</sup>                                   | This study                        |
| pJS363                     | 465bp from cosmid St4C6 containing <i>pcaV</i> in pBluescript KS+, Amp <sup>r</sup>                                      | This study                        |
| pJS364                     | pET28a-c(+) containing <i>pcaV</i> gene, Kan <sup>r</sup>                                                                | This study                        |
| pJS365                     | <i>pcaV</i> R15A mutant in pBluescript KS+, Amp <sup>r</sup>                                                             | This study                        |
| pJS366                     | pET28a-c(+) containing <i>pcaV</i> R15A mutant, Kan <sup>r</sup>                                                         | This study                        |
| pJS367                     | pET28a-c(+) containing <i>pcaV</i> R15K mutant, Kan <sup>r</sup>                                                         | This study                        |
| pJS368                     | pIJ10257 containing WT <i>pcaV</i> gene, Hyg <sup>r</sup>                                                                | This study                        |
| pJS369                     | pIJ10257 containing <i>pcaV</i> R15A gene, Hyg <sup>r</sup>                                                              | This study                        |
| pJS370                     | pIJ10257 containing <i>pcaV</i> R15K gene, Hyg <sup>r</sup>                                                              | This study                        |

Resistance markers; kanamycin (Kan), ampicillin (Amp) and hygromycin (Hyg)

**Table S2: Oligonucleotides used for this study**

| Oligonucleotide Name               | Application / Function                                                        | Sequence (5' – 3')                       |
|------------------------------------|-------------------------------------------------------------------------------|------------------------------------------|
| PcaV NdeI For                      | Cloning of <i>pcaV</i> gene                                                   | CATATCGCAGCGGTTCGATC                     |
| PcaV HindIII Rev                   | Cloning of <i>pcaV</i> gene                                                   | GGATCCAGGTGTGGGTCGTCTTC                  |
| PcaV R15A For                      | Site-directed mutagenesis of <i>pcaV</i> gene                                 | GGCCATCTGGCCGCGCGGCTGCAG                 |
| PcaV R15A Rev                      | Site-directed mutagenesis of <i>pcaV</i> gene                                 | TGCTGCAGCCGCGCGGCCAG                     |
| PcaV R15K For                      | Site-directed mutagenesis of <i>pcaV</i> gene                                 | ACCCCGGCCATCTGGCCAAGCGGCTGCAGCAGGC       |
| PcaV R15K Rev                      | Site-directed mutagenesis of <i>pcaV</i> gene                                 | GCCTGCTGCAGCCGCTTGCCAGATGGCCGGGT         |
| <i>pcaI</i> GSP1                   | 5' RACE of <i>pcaI</i> (SCO6703)                                              | TGTTTCGCGCCGATGTAG                       |
| <i>pcaI</i> GSP2                   | 5' RACE of <i>pcaI</i> (SCO6703)                                              | CAGCCCGGACTCCATC                         |
| <i>pcaI</i> GSP3                   | 5' RACE of <i>pcaI</i> (SCO6703)                                              | CTCGTACAGCGCCTGGATC                      |
| SCO <i>pcaV</i> -I Intergenic For  | Amplification of probe containing PcaV binding sites in <i>S. coelicolor</i>  | GCCACCACCTTGTCCATC                       |
| SCO <i>pcaV</i> -I Intergenic Rev  | Amplification of probe containing PcaV binding sites in <i>S. coelicolor</i>  | GGTGGGTGGCCAGATC                         |
| SAV <i>pcaV</i> -I Intergenic For  | Amplification of probe containing PcaV binding sites in <i>S. avermitilis</i> | TCCGTGAAGCCCCATCTC                       |
| SAV <i>pcaV</i> -I Intergenic Rev  | Amplification of probe containing PcaV binding sites in <i>S. avermitilis</i> | GTGTGCTCCTCGCTCCAC                       |
| SCAB <i>pcaV</i> -H Intergenic For | Amplification of probe containing PcaV binding sites in <i>S. scabies</i>     | TGGCGGTTCTGACGT                          |
| SCAB <i>pcaV</i> -H Intergenic Rev | Amplification of probe containing PcaV binding sites in <i>S. scabies</i>     | GTTTCGCTCCTCGGCTC                        |
| SCO <i>O<sub>V</sub></i> For       | Amplification of probe containing <i>O<sub>V</sub></i> binding site           | CACTCCCGGTGGTCACTT                       |
| SCO <i>O<sub>V</sub></i> bio Rev   | Amplification of probe containing <i>O<sub>V</sub></i> binding site           | bio - CGTCAAGACCCGCAAAAAG                |
| SCO <i>O<sub>I</sub></i> bio For   | Amplification of probe containing <i>O<sub>I</sub></i> binding site           | bio -TCTGCCTCGGACTTTTGC                  |
| SCO <i>O<sub>I</sub></i> Rev       | Amplification of probe containing <i>O<sub>I</sub></i> binding site           | GAGGAGCCCCATCTCTGC                       |
| SCO <i>O<sub>V</sub></i> 30 bp For | Generation of 30 bp probe containing <i>O<sub>I</sub></i> binding site        | CTGAAATACTCAGTGCCCTGACTATC<br>TGCT - bio |
| SCO <i>O<sub>V</sub></i> 30 bp Rev | Generation of 30 bp probe containing <i>O<sub>I</sub></i> binding site        | AGCAGATAGTCAGGGCACTGAGTAT<br>TTCAG - bio |
| SCO <i>O<sub>I</sub></i> 30 bp For | Generation of 30 bp probe containing <i>O<sub>V</sub></i> binding site        | TCACTTTCGTAGGTGCACTGACGATA<br>CATG - bio |
| SCO <i>O<sub>I</sub></i> 30 bp Rev | Generation of 30 bp probe containing <i>O<sub>V</sub></i> binding site        | CATGTATCGTCAGTGACCTACGAAA<br>GTGA - bio  |
| <i>pcaH</i> RT PCR For             | Detection of the <i>pcaH</i> (SCO6700) transcript                             | ACGGCTTCTACCGCTTCAC                      |
| <i>pcaH</i> RT PCR Rev             | Detection of the <i>pcaH</i> (SCO6700) transcript                             | GTCCTTCTTCGATCCAGGTG                     |
| <i>hrdB</i> RT PCR For             | Detection of the <i>hrdB</i> (SCO5820) transcript                             | CTCGAGGAAGAGGGTGTGAC                     |
| <i>hrdB</i> RT PCR Rev             | Detection of the <i>hrdB</i> (SCO5820) transcript                             | TGCCGATCTGCTTGAGGTAG                     |

**Table S3:** PcaV secondary structural elements

| Secondary structural element | Apo-PcaV residues | PcaV-PCA residues |
|------------------------------|-------------------|-------------------|
| $\alpha 0$                   | disordered        | 5 - 8             |
| $\alpha 1$                   | 9 - 29            | 9 - 29            |
| $\alpha 2$                   | 34 - 47           | 34 - 47           |
| $\beta 1$                    | 50 - 51           | 50 - 51           |
| $\alpha 3$                   | 52 - 60           | 52 - 60           |
| $\alpha 4$                   | 62 - 76           | 62 - 76           |
| $\beta 2$                    | 79 - 83           | 79 - 83           |
| W1                           | disordered        | 84 - 90           |
| $\beta 3$                    | 91 - 95           | 91 - 95           |
| $\alpha 5$                   | 96 - 119          | 96 - 119          |
| $\alpha 6$                   | 122 - 142         | 122 - 141         |

**Table S4:** Structural Homologs of PcaV

| MarR    | Dali Z-score | PDB          | MarR Family     | Arginine* | Experimentally determined role                                                                                                       | Reference |
|---------|--------------|--------------|-----------------|-----------|--------------------------------------------------------------------------------------------------------------------------------------|-----------|
| PcaV    | 100.0        | 4FHT<br>4G9Y | Anionic ligand  | Arg15     | Interacts directly with ligand (PCC) and important for DNA binding                                                                   | This work |
| PA1603  | 18.9         | 2NNN         | nd              | Arg17     | nd                                                                                                                                   | --        |
| Rha1    | 16.7         | 3FM5         | nd              | Arg17°    | nd                                                                                                                                   | --        |
| BldR    | 16.6         | 3F3X         | Redox           | Arg19**   | Predicted to bind DNA                                                                                                                | (18)      |
| MTH313  | 16.5         | 3BPX         | Anionic ligand  | Arg16**   | Interacts directly with ligand (salicylate)                                                                                          | (55)      |
| OhrR    | 16.4         | 1Z9C         | Redox           | Arg23     | Interacts directly with DNA                                                                                                          | (25)      |
| MosR    | 16.4         | 4FX4         | Redox           | Arg16     | nd                                                                                                                                   | (24)      |
| PA4135  | 16.2         | 2FB1         | nd              | None      | nd                                                                                                                                   | --        |
| SlyA    | 16.1         | 3Q5F<br>3DEU | Anionic ligand  | Arg14**   | Near DNA interface; hydrogen bonds with carbonyl from second SlyA molecule in dimer to stabilize DNA-bound form; binds to salicylate | (56)      |
| n/a     | 16.0         | 3NRV         | nd              | None      | --                                                                                                                                   | --        |
| MexR    | 15.9         | 1LNW         | ligand          | None      | --                                                                                                                                   | (59)      |
| n/a     | 15.8         | 3E6M         | nd              | Arg30°    | nd                                                                                                                                   | --        |
| ST1710  | 15.8         | 3GFL         | Anionic ligand  | Arg20**   | Interacts directly with salicylate                                                                                                   | (54)      |
| SCO5413 | 15.7         | 4B8X         | nd              | Arg37°    | nd                                                                                                                                   | (28)      |
| n/a     | 15.4         | 3CJN         | nd              | Arg29°    | nd                                                                                                                                   | nd        |
| n/a     | 15.3         | 3S2W         | nd              | Arg30**   | nd                                                                                                                                   | nd        |
| MarR    | 15.1         | 1JGS         | Anionic ligand  | None      | nd                                                                                                                                   | (47)      |
| SarZ    | 15.0         | 3HRM         | Redox           | None      | --                                                                                                                                   | (27)      |
| n/a     | 14.9         | 3BJA         | nd              | Arg11     | nd                                                                                                                                   | --        |
| MepR    | 14.0         | 3ECO         | Cationic ligand | Arg10     | nd                                                                                                                                   | (53)      |
| TcaR    | 11.6         | 3KP6         | Anionic ligand  | None      | --                                                                                                                                   | (17)      |

\*Identity of the arginine which is in a structurally homologous position as Arg15 in PcaV or interacts in a functionally homologous manner. Because of the plasticity in helices within the MarR fold, there are often shifts in the helical register of the N-terminal helix (which includes PcaV Arg15) when two structural homologs are optimally overlapped with one another. For this reason, we include arginines whose sidechains overlap with that of Arg15 (\*\*), but whose backbones are displaced by one helical turn; we have also listed those arginines that lie

between PcaV Arg15/Arg16 or overlap with Arg16 (°). The latter arginines are included in this table because the sidechain may move into a position more similar to Arg15 if ligand is bound. However, for the calculation of the percentage of MarR homologs with a “structurally conserved” arginine, we included only those arginines that overlapped perfectly with PcaV Arg15 or whose sidechain overlapped with that of PcaV Arg15.

\*\*Arginine is one helical turn away from the position of Arg15 in PcaV, but the guanadnium headgroups of both arginines are in nearly identical locations

°Arginine overlaps with PcaV Arg16

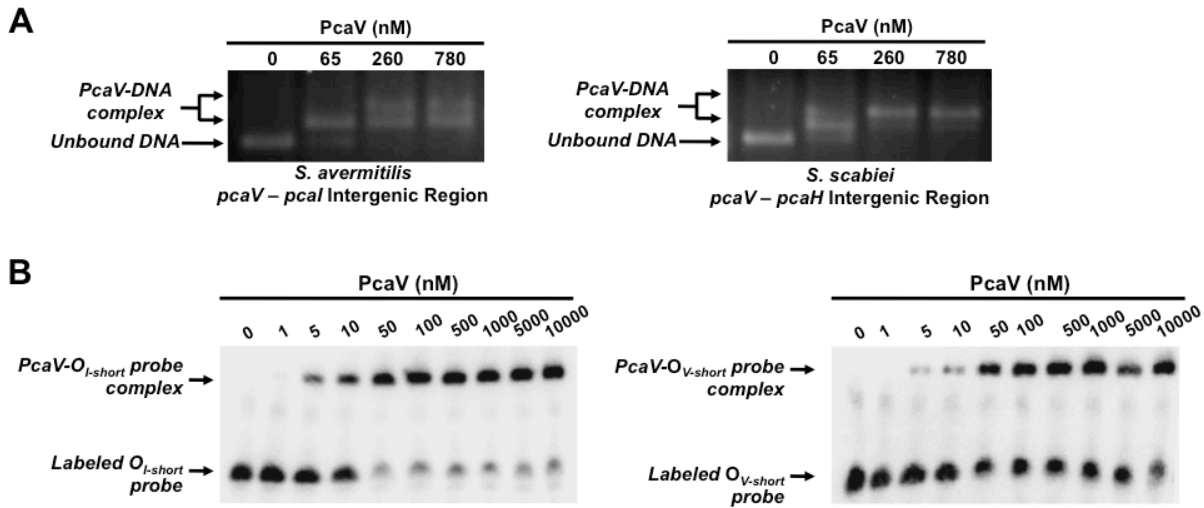

**Figure S1.** (A) Agarose EMSA experiments using PCR-amplified DNA probes spanning the *pcaV-pcaI* and *pcaV-pcaH* intergenic regions of *S. avermitilis* and *S. scabiei*, respectively. A change in DNA migration is observed upon addition of increasing concentrations of PcaV in comparison to the unbound DNA probe. The formation of the PcaV-probe complex is indicated by a double arrow while the unbound DNA is indicated with a single arrow. (B) EMSA experiments using 30-bp biotin-labeled probes containing the O<sub>I</sub> site (O<sub>I</sub>-short, left panel) and O<sub>V</sub> site (O<sub>V</sub>-short, right panel) and increasing concentrations of PcaV to confirm specificity of PcaV for operator sites. A single shifted band corresponding to the PcaV-DNA probe complex is observed.

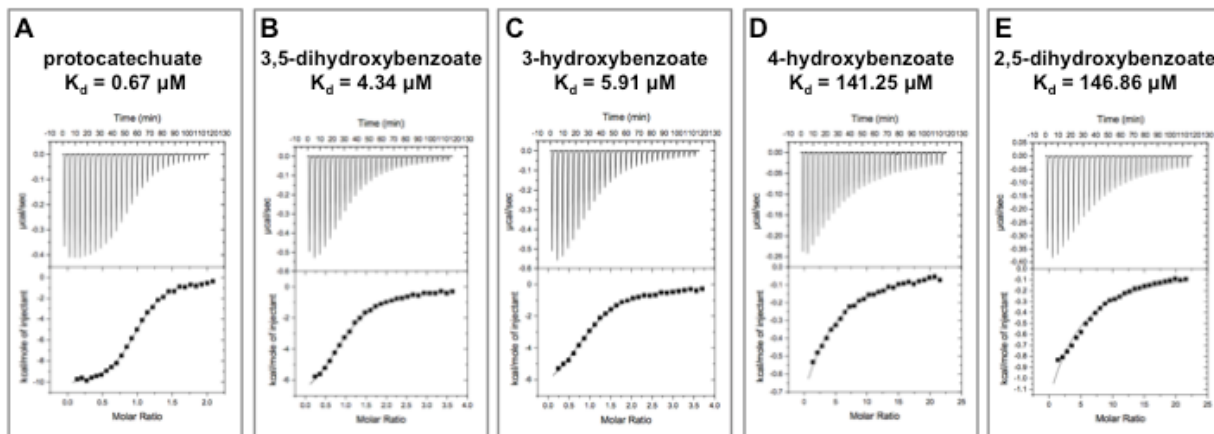

**Figure S2.** Representative binding isotherms of PcaV with aromatic ligands protocatechuate (3,4-dihydroxybenzoate, *A*), 3,5-dihydroxybenzoate (*B*), 3-hydroxybenzoate (*C*), 4-hydroxybenzoate (*D*), and 2,5-dihydroxybenzoate (*E*). Average dissociation constants ( $K_D$ ) for each ligand are provided (4-hydroxybenzoate and 2,5-dihydroxybenzoate are low affinity ligands and thus these experiments were performed using the criteria established by Turnbull and Daranas for the analysis of low affinity systems using ITC). Top panel displays raw data and bottom panel is the corresponding binding isotherm generated using a one-site binding model.



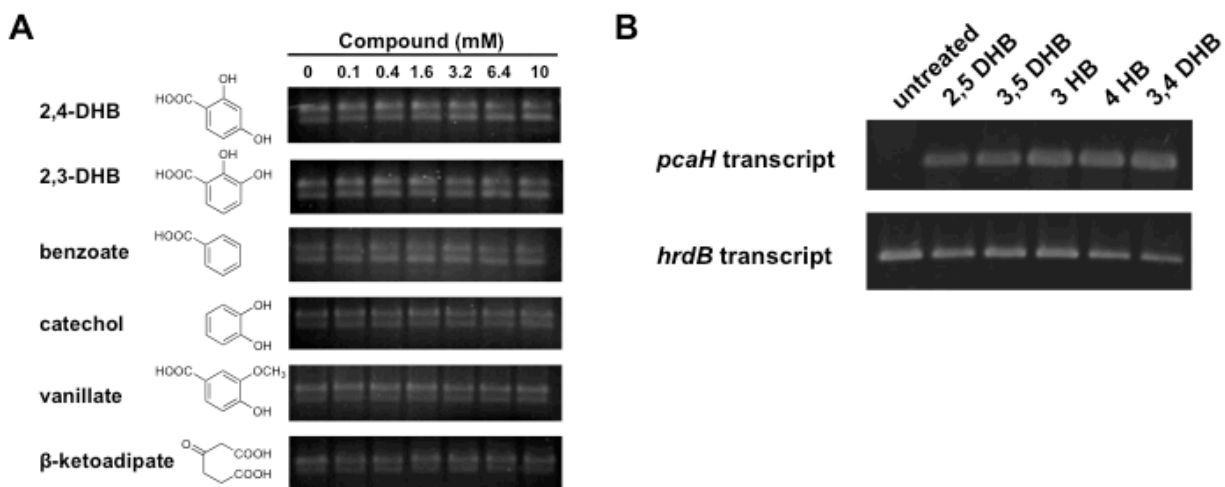

**Figure S3.** (A) EMSAs of PcaV in complex with the *pcaV-pcaI* intergenic DNA probe in the presence of increasing amounts of the indicated compounds. No dissociation of PcaV from DNA is observed. (B) Transcriptional response of *S. coelicolor* M600 to 2,5 dihydroxybenzoate, 3,5-dihydroxybenzoate, 3-hydroxybenzoate, 4-hydroxybenzoate, and 3,4-dihydroxybenzoate. The *pcaH* transcript is induced in response to the PcaV ligands. The *hrdB* control transcript was detected in all of the RNA samples. The *hrdB* gene encodes a necessary vegetative sigma factor and is constitutively transcribed.

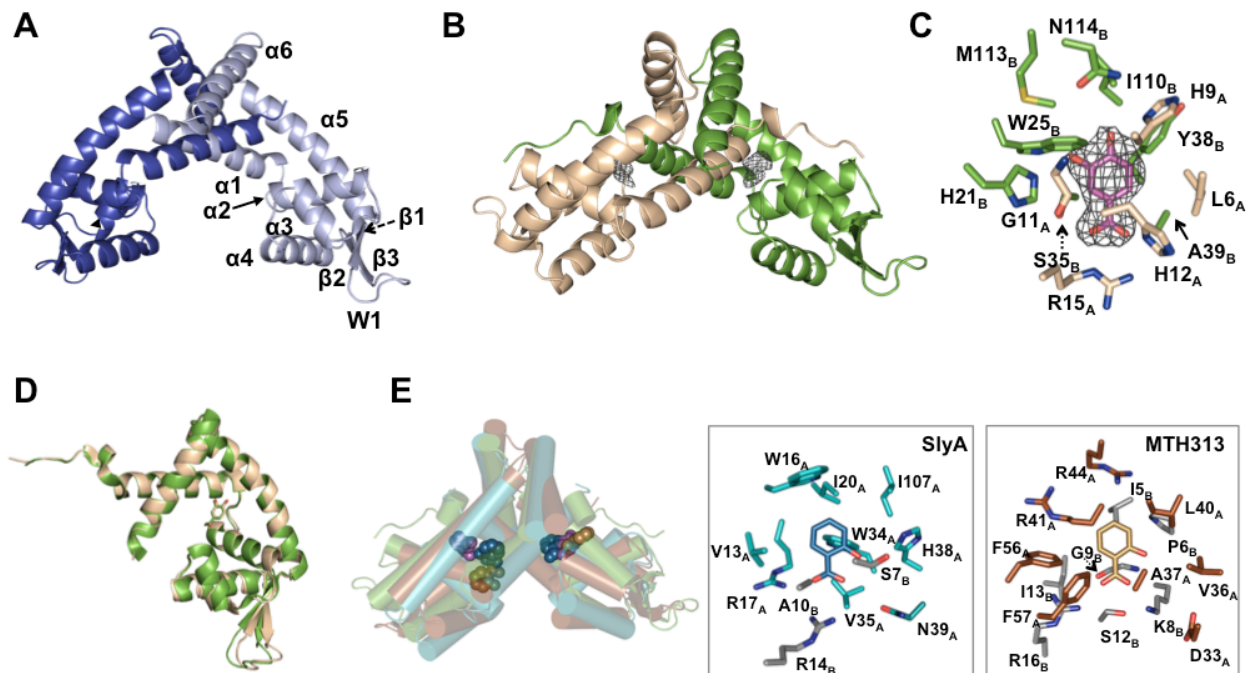

**Figure S4.** (A) Crystal structure of WT PcaV shown as a cartoon representation with each monomer in light and dark blue, respectively. Secondary structure elements are labeled. (B) Cartoon representation of PCA-bound PcaV (colored as in **Figure 2**) with simple composite omit map shown for protocatechuate ligand.  $\sigma A$ -weighted  $2mF_o - dF_c$  electron density map shown as grey mesh and contoured at  $1.5 \sigma$ . (C) Binding pocket of PCA (as in **Figure 2D**) shown with omit map. Ligand was absent from model when omit map was generated. (D) Overlay of monomer A and B from the PcaV-PCA complex illustrating the overlapping PCA binding pockets and the small differences in the W1 region between each monomer. (E) Overlay of PcaV (green), SlyA (cyan, PDB 3DEU) and MTH313 (brown, PDB 3BPX) with bound ligands shown as spheres. Only two of six salicylate molecules present in the SlyA crystal structure are shown. Inset: ligand binding pockets in SlyA and MTH313 that are located in an orientation similar to that observed in the PcaV-PCA structure. Bound salicylate molecules and the residues that become buried upon ligand-binding are shown as sticks.

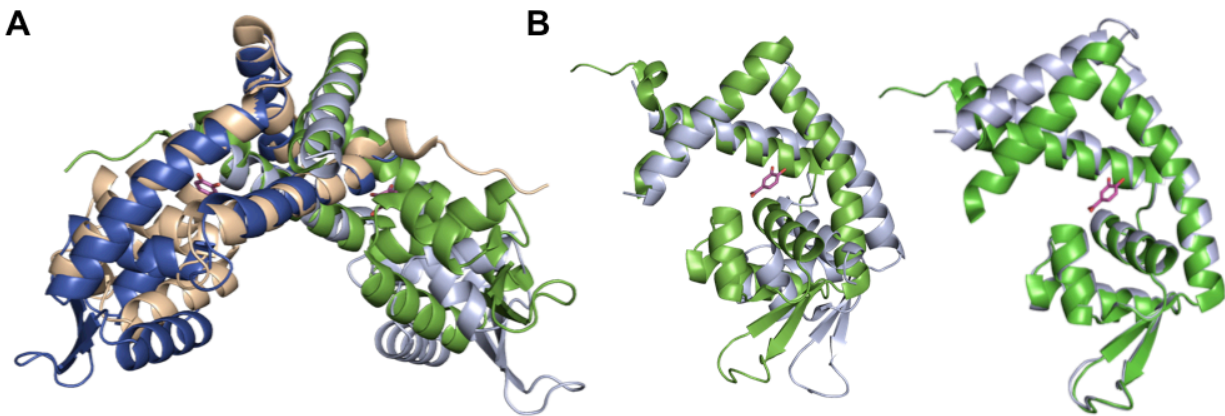

**Figure S5.** (A) Superposition of WT PcaV and PcaV-PCA shown as cartoon representation and colored as in **Figure 3**. (B). Superposition of one monomer of apo-PcaV onto one monomer of ligand-bound PcaV using either the dimerization core domain (left panel) or the wHTH core (right panel) shows that each PcaV monomer contains two rigid-body domains.

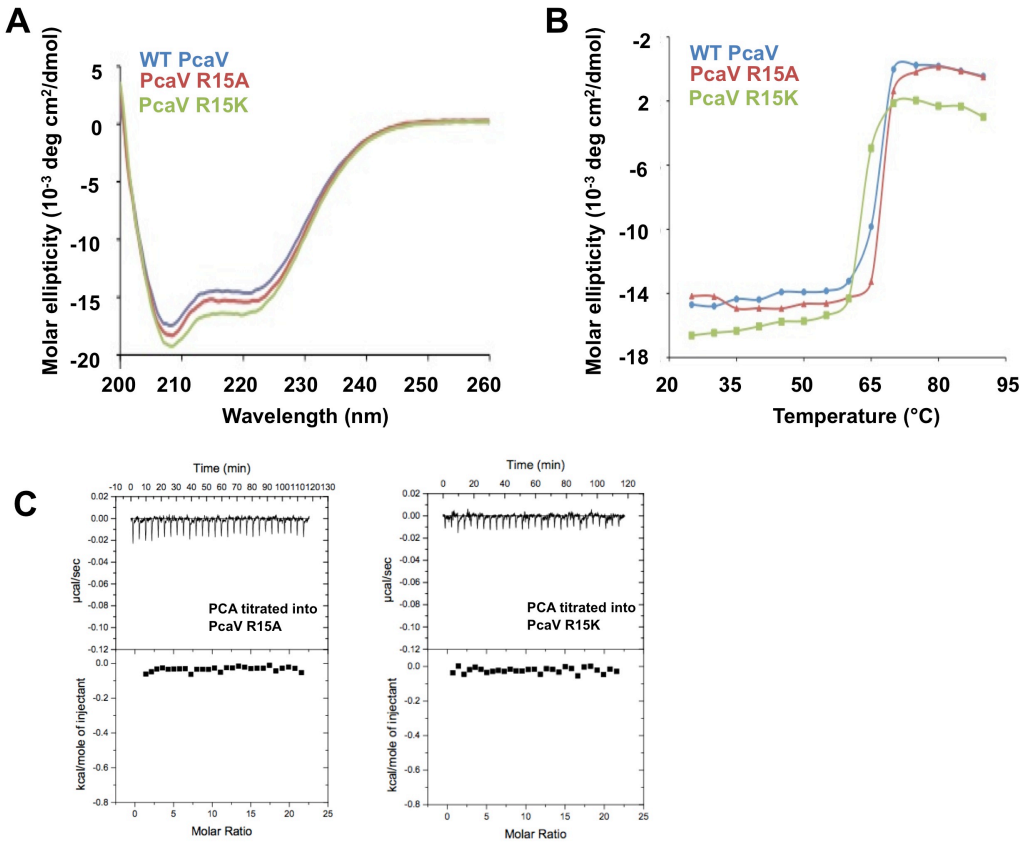

**Figure S6.** Circular dichroism wavelength scans (A) and temperature scans (B) show that PcaV R15A and PcaV R15K mutants (red and green traces, respectively) are well-folded and behave similarly to WT PcaV (blue traces). (C) ITC experiments show there is no binding resulting from titration of PCA ligand into either PcaV R15A or PcaV R15K mutants. Top panel displays raw data and bottom panel is the corresponding binding isotherm generated using a one-site binding model.
